# Supplementary material for: Pushing the limits of solubility prediction via quality-oriented data selection
Source: PubMed Central journal article supplement (PMC7788089; doi:10.1016/j.isci.2020.101961), 2020-12-17
Supplement: mmc1.pdf [file mmc1.pdf]

**iScience, Volume 24**

**Supplemental Information**

**Pushing the limits  
of solubility prediction  
via quality-oriented data selection**

**Murat Cihan Sorkun, J.M. Vianney A. Koelman, and Süleyman Er**

## Transparent Methods

### Quality-oriented data selection

Quality-oriented data selection identifies the quality of datasets by calculating the deviations in the multi-lab experimental measurements of the compounds. Using the quality information, the highest quality dataset is reserved as the test set and the poor quality datasets are removed from the training set. To assess the quality of each dataset, the following steps have been applied:

- Compounds that have multi-lab measurement data have been identified.
- The average of the measured solubility values of compounds have been calculated.
- The deviations of measurement data from the average values have been calculated.
- The SDs of the constituting datasets have been calculated.

The SDs for each dataset (from *A* to *I*) have been calculated using Eq. 1:

$$SD = \sqrt{\frac{1}{n} \sum_{i=1}^n x_i - \bar{x}} \quad (1)$$

where  $n$  is the total number of compounds that have multi-lab measurement data,  $x_i$  is the experimentally measured solubility value of compound  $i$ , and  $\bar{x}$  is the average of multi-lab solubility values of the compound.

The SDs of the combinatorial datasets (i.e. "non-AF" and "All") have been calculated using Eq. 2:

$$SD = \frac{1}{N} \sum_{j=1}^Z SD_j T_j \quad (2)$$

where  $N$  is the total number of compounds in the dataset,  $Z$  is the total number of constituent datasets,  $SD_j$  is the SD of dataset  $j$ , and  $T_j$  is the total number of compounds that have been included from dataset  $j$ .

### Data pre-processing

To prepare the datasets for training, we removed the compounds from datasets when they met any of the following criteria:

- The compound exists in the test set (dataset *E*).
- The compound does not contain carbon atom.
- The compound contains adjoined mixtures.
- The compound contains charged atoms.

The remaining numbers of compounds found in each training sub-dataset, obtained after the completion of data pre-processing, have been shown in Table 1 (Filtered Size).

### Descriptor selection

To generate the molecular descriptors, we used the Mordred Python package [1]. Currently, there are more than 1800 2D and 3D descriptors in the Mordred catalog. To determine the most relevant descriptors, we applied the following feature selection methods:

- **Least absolute shrinkage and selection operator (LASSO):** A regression analysis method that enhances the prediction accuracy and interpretability of the statistical model. To learn the best descriptors (i.e. variables) the LASSO regularization eliminates the irrelevant descriptors by forcing their coefficients to zero.
- **Pearson correlation coefficient (PCC):** Selects the descriptors that have PCC with LogS higher than a defined threshold parameter.

For both methods, we tested different parameter sets that change the strictness of selections. The results of these different configurations are provided in Table S2-S11.

Out of the generated 123 descriptors using Mordred, 58 have been selected by LASSO regularization. The correlation matrix of the selected chemical descriptors is shown in Figure S2. The complete list of the selected descriptors, including their names and descriptions, are shown in Table S1.

## Machine learning algorithms

We employed the following ML algorithms in combination with the scikit-learn and xgboost Python packages.

- Artificial neural network (ANN)
- Random forest (RF)
- Extreme gradient boosting (XGB)

ANN is a network consisting of several layers that are connected to each other through the neurons it contains. ANN learns non-linear functions by modifying the coefficients between neurons via a back-propagation algorithm. In the current work, the ANN configuration employs single hidden layer with 500 neurons and a *tanh* activation function. RF is an ensemble of decision trees that use bootstrap aggregating of the instances and a random sampling of the features. Our RF configuration consists of 1000 trees with the maximum depth. XGB is a regularized gradient boosting algorithm that creates a strong learner from an ensemble of many weak trees that are trained sequentially. Our XGB configuration consists of 1000 trees with a maximum depth of six. Other parameters of the models are used with their default values. Lastly, our consensus model is based on a combination of the above three ML models and an arithmetic averaging of the predictions by these models.

## Configuration of the AqSolPred

The best performing AqSolPred model has been achieved by using the following configuration:

- **Training set:** *non-AF* (4399 data instances)
- **Features:** 58 2D descriptors as selected by LASSO with  $\alpha = 0.01$
- **ML Algorithm:** A consensus of ANN, RF, and XGB models

## Chemical space visualization

We used tailored similarity for the visualization of the chemical space based on 58 LASSO-selected descriptors. We applied t-SNE from scikit-learn Python package to reduce the data into two-dimensions with the following two parameters, while the remaining parameters are used with their default values:

- **Perplexity:** 50
- **Random state:** 1



## Supplemental Table

**Table S1. The names and descriptions of a total of 58 LASSO-selected descriptors, Related to Table 3.**

| ID | Name        | Description                                                      | ID | Name   | Description     |
|----|-------------|------------------------------------------------------------------|----|--------|-----------------|
| 1  | nHeavyAtom  | number of heavy atoms                                            | 30 | NssssC | number of ssssC |
| 2  | nHBAcc      | number of hydrogen bond acceptor                                 | 31 | SsCH3  | sum of sCH3     |
| 3  | nHBDon      | number of hydrogen bond donor                                    | 32 | SdCH2  | sum of dCH2     |
| 4  | nRot        | rotatable bonds count                                            | 33 | SssCH2 | sum of ssCH2    |
| 5  | nBonds      | number of all bonds in non-kekulized structure                   | 34 | StCH   | sum of tCH      |
| 6  | nBondsO     | num of bonds connecting to heavy atom in non-kekulized structure | 35 | SdsCH  | sum of dsCH     |
| 7  | nBondsS     | number of single bonds in non-kekulized structure                | 36 | SaaCH  | sum of aaCH     |
| 8  | nBondsD     | number of double bonds in non-kekulized structure                | 37 | SsssCH | sum of sssCH    |
| 9  | TopoPSA(NO) | topological polar surface area (use only nitrogen and oxygen)    | 38 | StsC   | sum of tsC      |
| 10 | TopoPSA     | topological polar surface area                                   | 39 | SdssC  | sum of dssC     |
| 11 | LabuteASA   | Labute's Approximate Surface Area                                | 40 | SaaC   | sum of aaC      |
| 12 | bpol        | bond polarizability                                              | 41 | SaaaC  | sum of aaaC     |
| 13 | nAcid       | acidic group count                                               | 42 | SssssC | sum of sssssC   |
| 14 | nBase       | basic group count                                                | 43 | SsNH2  | sum of sNH2     |
| 15 | ECIndex     | eccentric connectivity index                                     | 44 | SssNH  | sum of dNH      |
| 16 | GGI1        | 1-ordered raw topological charge                                 | 45 | SaaN   | sum of aaN      |
| 17 | SLogP       | Wildman-Crippen LogP                                             | 46 | SsssN  | sum of sssN     |
| 18 | SMR         | Wildman-Crippen MR                                               | 47 | SaaN   | sum of aaN      |
| 19 | BertzCT     | Bertz CT                                                         | 48 | SsOH   | sum of sOH      |
| 20 | BalabanJ    | Balaban's J index                                                | 49 | SdO    | sum of dO       |
| 21 | WPol        | Wiener polarity index                                            | 50 | SssO   | sum of ssO      |
| 22 | Zagreb1     | Zagreb index (version 1)                                         | 51 | SaaO   | sum of aaO      |
| 23 | ABCGG       | atom-bond connectivity index                                     | 52 | SsF    | sum of sF       |
| 24 | nHRing      | hetero ring count                                                | 53 | SdsssP | sum of dsssP    |
| 25 | naHRing     | aromatic hetero ring count                                       | 54 | SdS    | sum of dS       |
| 26 | NsCH3       | number of sCH3                                                   | 55 | SddssS | sum of ddssS    |
| 27 | NssCH2      | number of ssCH2                                                  | 56 | SsCl   | sum of sCl      |
| 28 | NaaCH       | number of aaCH                                                   | 57 | SsI    | sum of sI       |
| 29 | NaaaC       | number of aaaC                                                   | 58 | C      | C atoms count   |

## References

- [1] Moriwaki, H., Tian, Y. S., Kawashita, N. & Takagi, T. Mordred: a molecular descriptor calculator. *Journal of cheminformatics* **10**, 4 (2018).
